# Supplementary material for: Decatropis bicolor (Zucc.) Radlk essential oil induces apoptosis of the MDA-MB-231 breast cancer cell line
Source: Springer Nature journal article supplement (doi:10.1186/s12906-016-1136-7), 2016-08-02

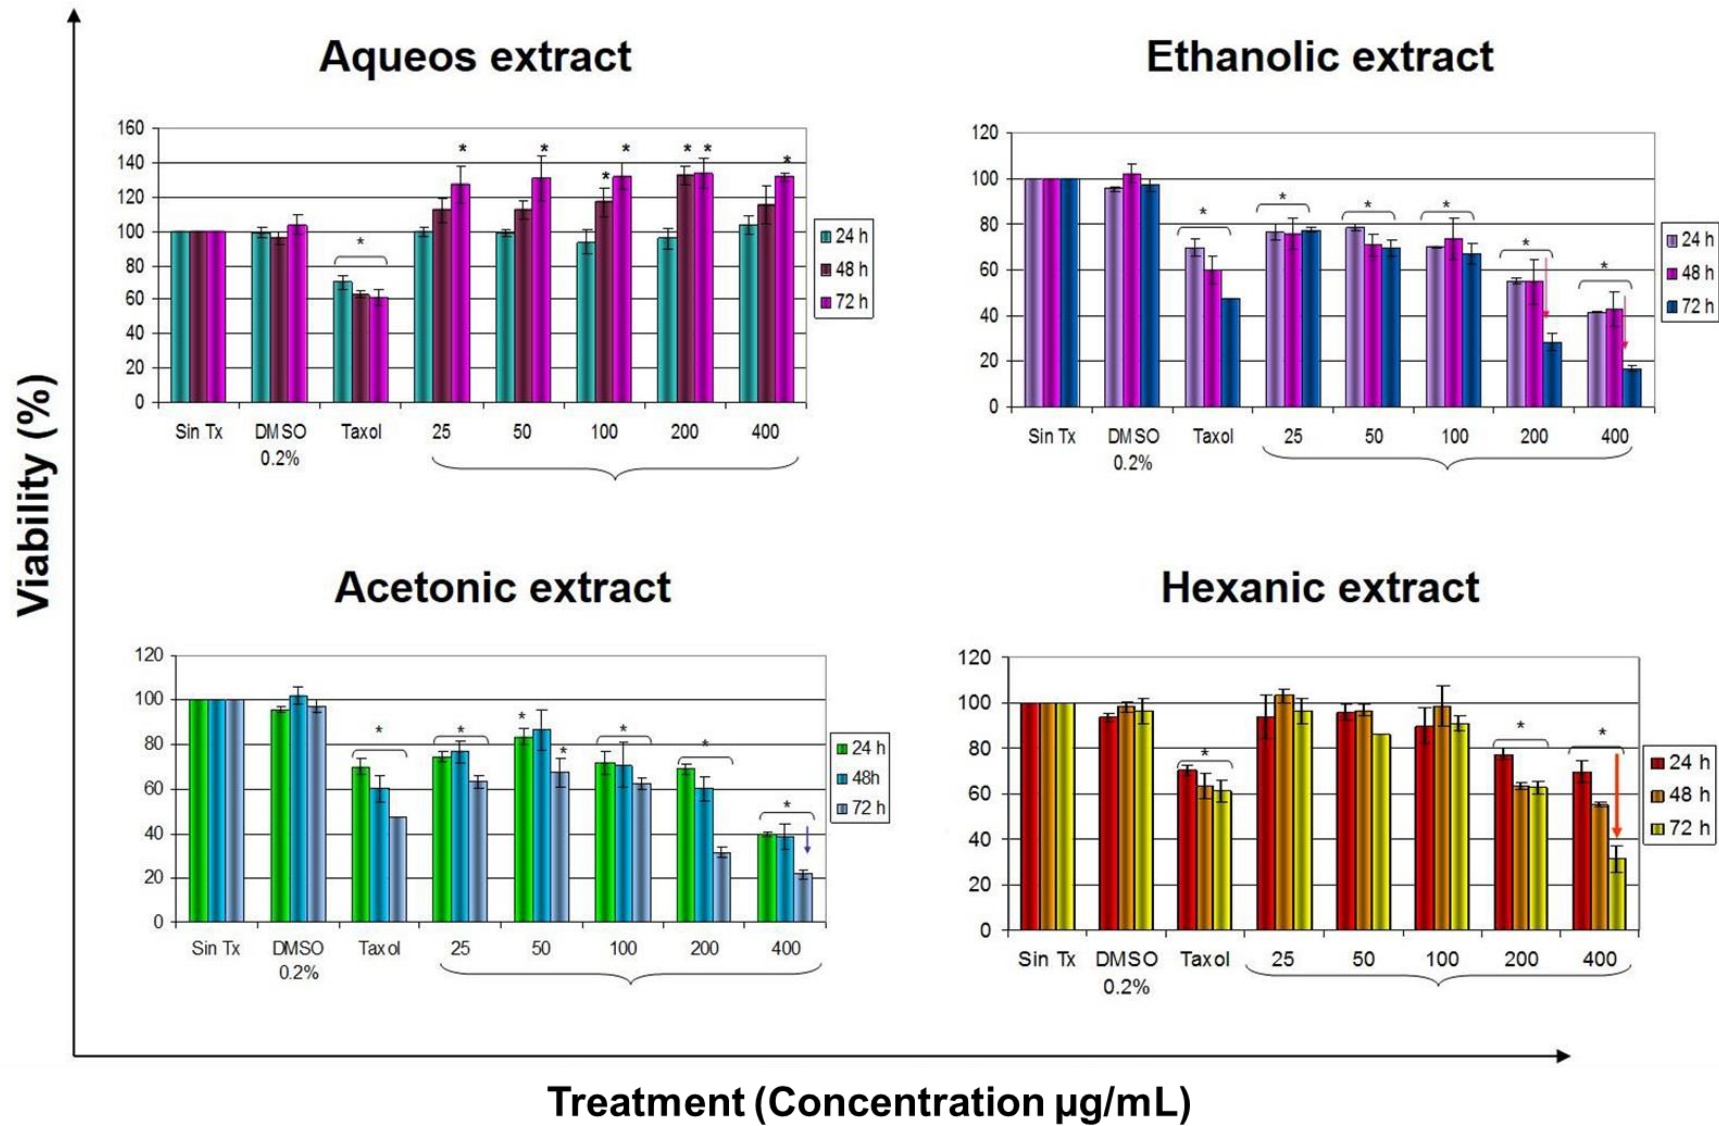

Supplement: MOESM1 [file 10561512]
